# Supplementary material for: Corrupted coordination of epigenetic modifications leads to diverging chromatin states and transcriptional heterogeneity in CLL
Source: PubMed Central journal article supplement (PMC6478836; doi:10.1038/s41467-019-09645-5), 2019-04-23
Supplement: 41467_2019_9645_MOESM1_ESM.pdf [file 41467_2019_9645_MOESM1_ESM.pdf]

## **Supplementary Information**

**Corrupted coordination of epigenetic modifications leads to diverging chromatin states and transcriptional heterogeneity in CLL**

**Pastore A, Gaiti F, *et al.***

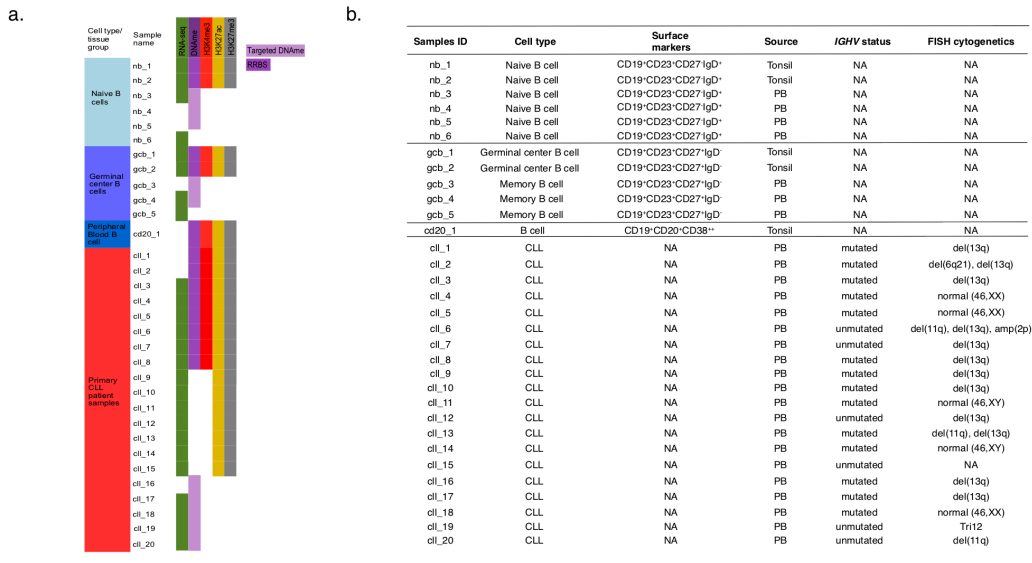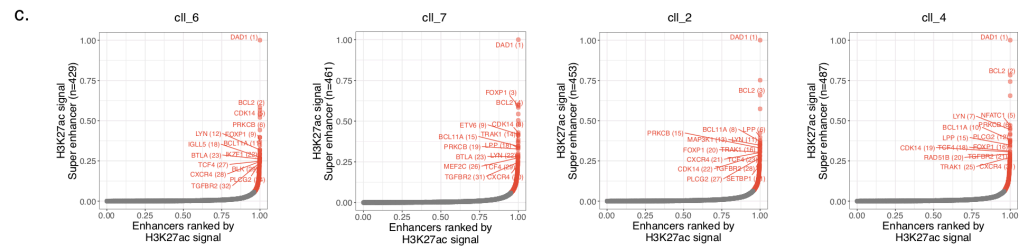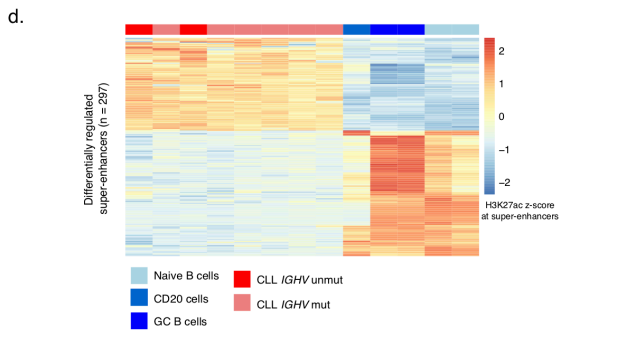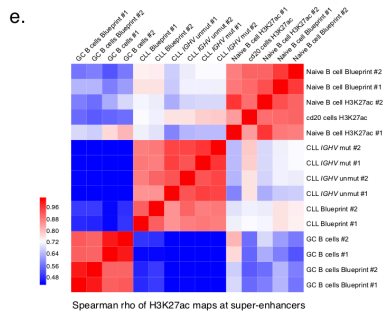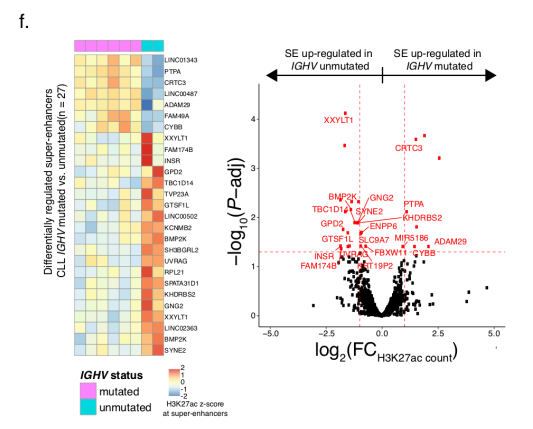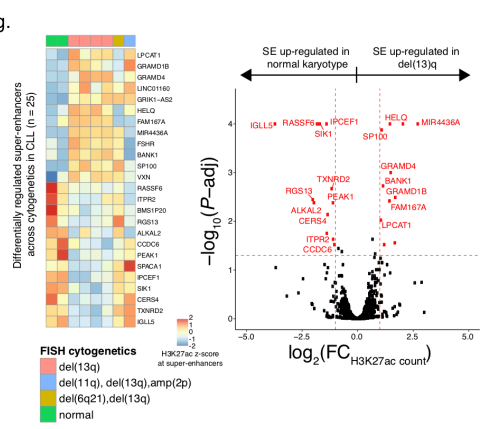

**Supplementary Figure 1. H3K27ac analysis of CLLs and normal B cell controls at super-enhancers.**

**(a)** Overview of samples used in this study across our cohort. See Supplementary Data 1 for the list of additional CLL and normal B cell samples used in this study from the Blueprint Initiative. **(b)** Summary table of healthy B cell and CLL patient samples used in this study across our cohort, including cell type, surface markers, source, *IGHV* mutational status, FISH cytogenetics and CLL driver mutations. PB: Peripheral Blood. **(c)** Enhancer profiles for four representative CLL samples, using H3K27ac ChIP-seq signal. Super-enhancers (SE) are highlighted in red with ranks of selected SE-associated genes. See Methods for SE identification criteria. **(d)** Extended heatmap of H3K27ac profiles shown in Fig. 1a for 297 differentially regulated super-enhancers (absolute  $\log_2[\text{H3K27ac fold-change}] > 2$  and Wald test BH-FDR  $< 0.01$ ) between CLL and normal B cells. Red indicates high H3K27ac level, blue low H3K27ac level. **(e)** Spearman's rho correlation coefficients of H3K27ac enrichment signal at super-enhancers across our cohort and Blueprint initiative samples. Red indicates high Spearman's correlation, blue indicates low Spearman's correlation. **(f)** *Left:* Heatmap of H3K27ac profiles for 27 differentially regulated super-enhancers (absolute  $\log_2[\text{H3K27ac fold-change}] > 1$  and Wald test BH-FDR  $< 0.05$ ) between CLL *IGHV* mutated and unmutated samples. Red indicates high H3K27ac level, blue low H3K27ac level. *Right:* volcano plot of differential H3K27ac signal at super-enhancers between CLL *IGHV* mutated and unmutated samples. **(g)** Same as panel **(f)** for 25 differentially regulated super-enhancers (absolute  $\log_2[\text{H3K27ac fold-change}] > 1$  and Wald test BH-FDR  $< 0.05$ ) between CLL patient samples with common somatic copy number abnormalities [del(13q), del(11q), del(17p), del(6q), amp(2p)] and normal karyotype. Cytogenetics were evaluated by FISH analysis (see Methods).

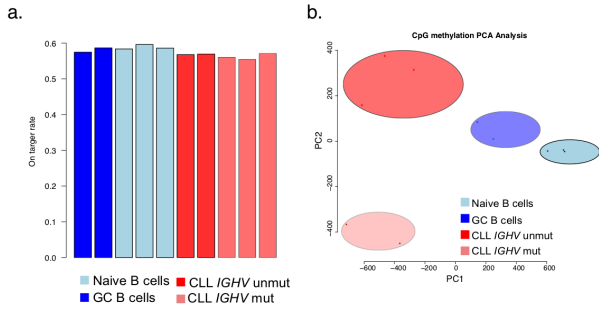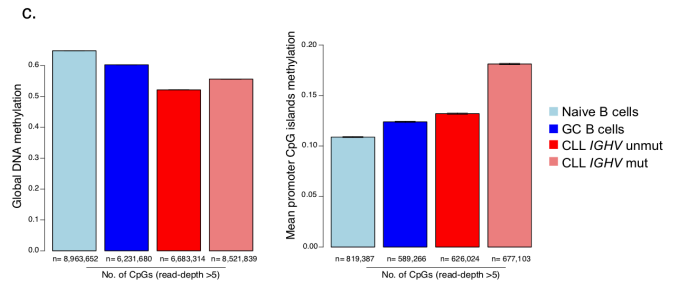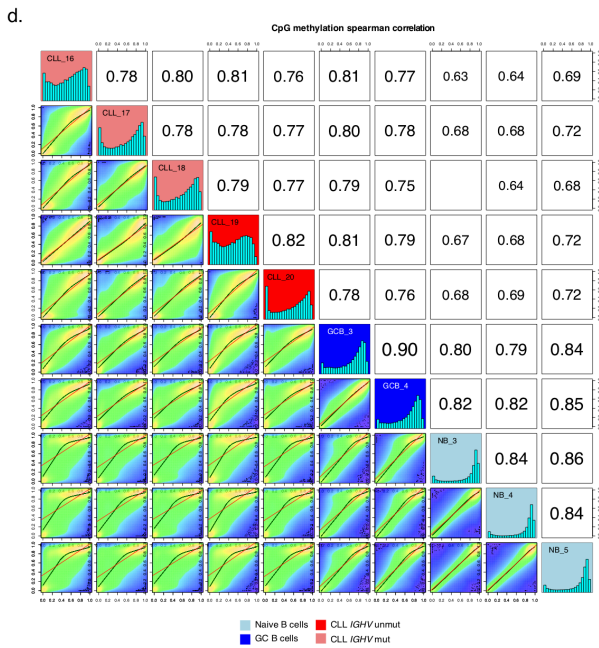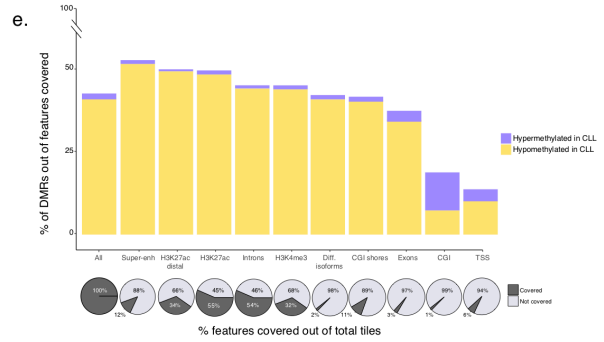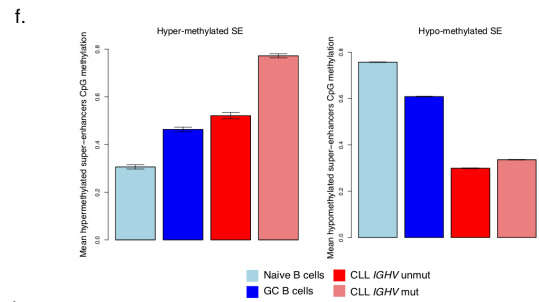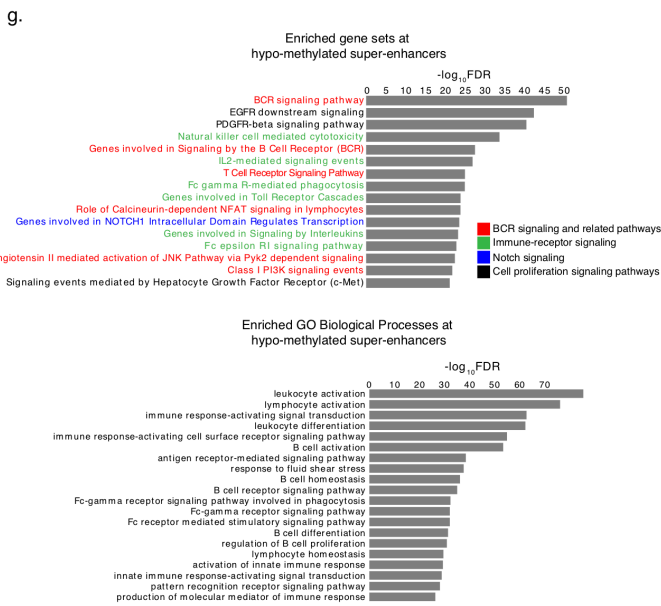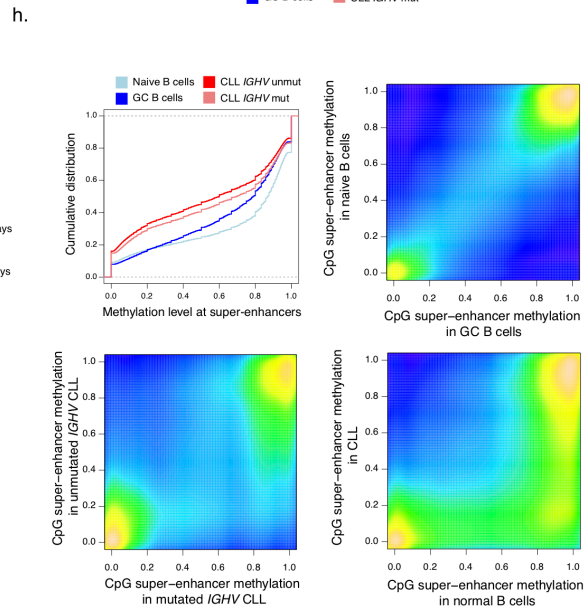

**Supplementary Figure 2. Targeted bulk DNAm sequencing capture assay of CLLs and normal B cell controls.**

(a) On-target rate of the hybrid capture DNAm probes across all CLL (*IGHV* unmutated, n = 2; *IGHV* mutated, n = 3) and normal B (peripheral blood naïve B cells, n = 3; peripheral blood memory B cells, n = 2) samples. (b) Unsupervised principal component analysis (PCA) of targeted DNAm sequencing capture assay data for CLL and normal B samples. Same samples as in panel (a) were used. PCA was computed by filtering rows with a standard deviation lower than the 50<sup>th</sup> percentile of standard deviation distribution. (c) Global (*left*) and promoter CpG islands (*right*) mean CpG methylation in pooled CLL compared with pooled normal B samples, measured with targeted bisulfite sequencing capture assay. Same samples as in panel (a) were used. (d) Scatterplots of pairwise Spearman correlation between CLL and normal B samples. Same samples as in panel (a) were used. The red line in the plot is from linear regression fit and the green line is from LOWESS polynomial regression fit. (e) Percentage of differentially methylated regions (DMRs) covered by targeted bisulfite sequencing capture assay that overlap with distinct genomic features. (f) CLL CpG methylation compared with normal B cells at hyper-methylated super-enhancers in CLL (n = 122, *left*) and hypo-methylated super-enhancers in CLL (n = 2009, *right*). (g) *Top*: Gene set enrichment for CLL hypomethylated super-enhancers. *Bottom*: Gene ontology enrichment for CLL hypomethylated super-enhancers. See Supplementary Data 9 for complete list of significantly enriched gene sets. (h) Cumulative distribution of CpG methylation values in CLL and normal B cells at super-enhancers (n = 2,869) (*top left*). Scatter plots comparing methylation pattern consistency at super-enhancers of two normal B cell samples (*top right*), and two CLL samples (*bottom left*). A comparison between CpG methylation levels at super-enhancers in CLL (no. of CpGs used = 468,303) and normal B cells (no. of CpGs used = 502,607) is also shown (*bottom right*). Throughout the figure, error bars represent 95% confidence interval.

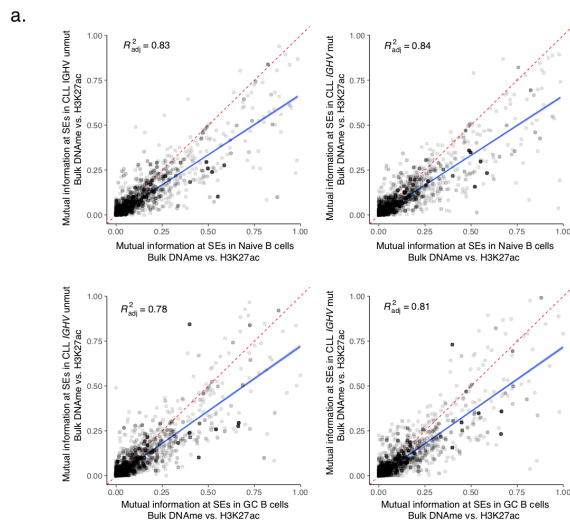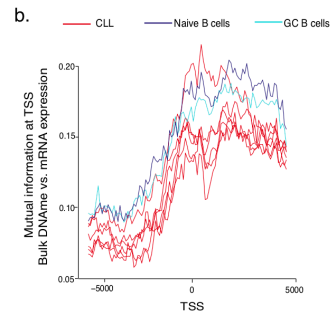

**c.**

| Samples ID | Cell type     | Surface markers                    | IGHV status | No. of single cells |
|------------|---------------|------------------------------------|-------------|---------------------|
| scBcell    | Normal B cell | CD19 <sup>+</sup>                  | NA          | 96                  |
| scCLL_21   | CLL           | CD19 <sup>+</sup> CD5 <sup>+</sup> | unmutated   | 96                  |
| scCLL_22   | CLL           | CD19 <sup>+</sup> CD5 <sup>+</sup> | mutated     | 192                 |

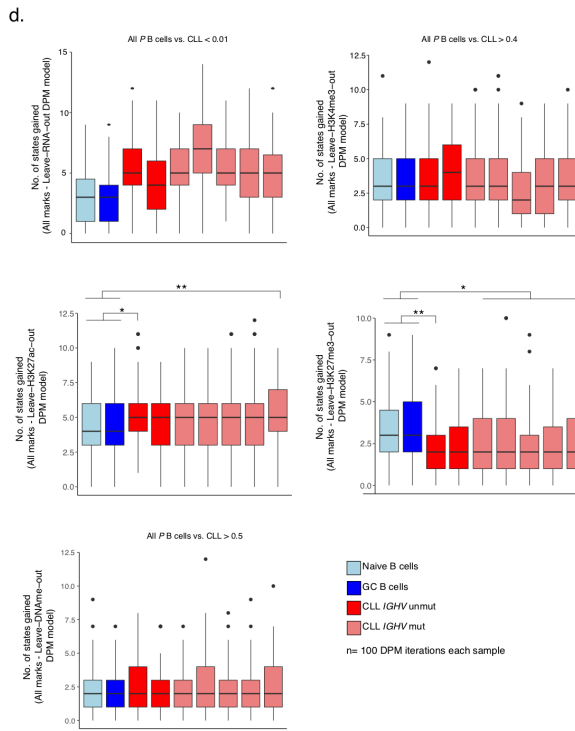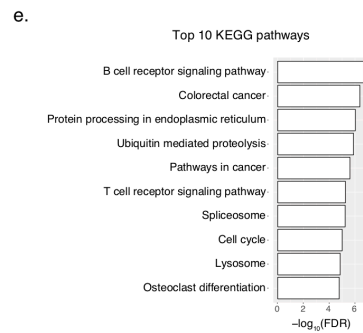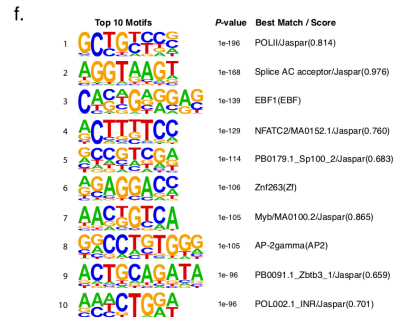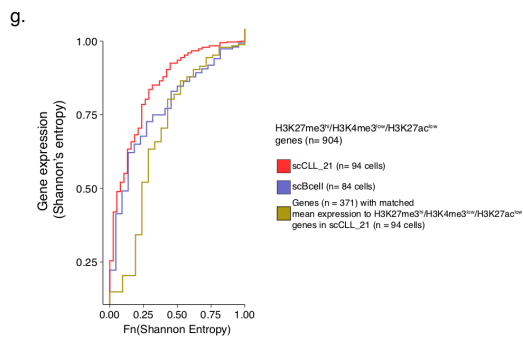

### Supplementary Figure 3. Normal B cells exhibit higher coordinated transcriptional regulation compared with CLL.

(a) Regression analysis of mutual information (MI) at super-enhancers ( $n = 2,869$ ) between bulk DNAm based on targeted bisulfite sequencing capture assay and H3K27ac for CLL (y-axes) and normal B (x-axes) samples. (b) MI at transcription start sites of genes between DNAm (based on bulk bisulfite sequencing) and gene expression in CLL and normal B samples. (c) Summary table of healthy donors and CLL patient single cell samples used in this study, including the cell type, surface markers, *IGHV* mutational status and number of single cells sequenced. (d) From *left to right*: number of states gained when adding bulk RNA-seq data to the epigenomic mapping (H3K4me3, H3K27ac, H3K27me3, bulk DNAm based on bisulfite sequencing) in the DPM analysis for CLL and normal B samples; number of states gained when adding H3K4me3 data to the epigenomic mapping (bulk RNA-seq data, H3K27ac, H3K27me3, bulk DNAm); number of states gained when adding H3K27ac data to the epigenomic mapping (bulk RNA-seq data, H3K4me3, H3K27me3, bulk DNAm); number of states gained when adding H3K27me3 data to the epigenomic mapping (bulk RNA-seq data, H3K27ac, H3K4me3, bulk DNAm); number of states gained when adding DNAm data to the epigenomic mapping (bulk RNA-seq data, H3K27ac, H3K27me3, H3K4me3). Boxplots represent median and bottom and upper quartile. Lower and upper whiskers correspond to  $1.5 \times \text{IQR}$ . \* indicates two-sided Mann-Whitney U test  $P$ -value  $< 0.05$ . \*\* indicates  $P$ -value  $< 0.01$ . 100 DMP iterations were performed for each sample. (e) KEGG pathways enriched at genes marked by H3K27me3<sup>hi</sup>/H3K4me3<sup>low</sup>/H3K27ac<sup>low</sup> from Fig. 3e. Shown are the top 10 KEGG pathway categories (hypergeometric test BH-FDR  $< 0.05$ ). (f) Position weight matrices of the top 10 motifs over-represented in CLL in regions marked by H3K27me3<sup>hi</sup>/H3K4me3<sup>low</sup>/H3K27ac<sup>low</sup> from Fig. 3e. Motif enrichment hypergeometric test  $P$ -value and the best match to the reference motif in the JASPAR core database are also shown. (g) Cumulative distribution of single-cell gene expression Shannon's information entropy for H3K27me3<sup>hi</sup>/H3K4me3<sup>low</sup>/H3K27ac<sup>low</sup>-marked genes in CLL (red;  $n = 94$ ) and normal B (blue;  $n = 84$ ) cells, along with genes ( $n = 371$ ) with matched mean expression to H3K27me3<sup>hi</sup>/H3K4me3<sup>low</sup>/H3K27ac<sup>low</sup>-marked genes in CLL (yellow).

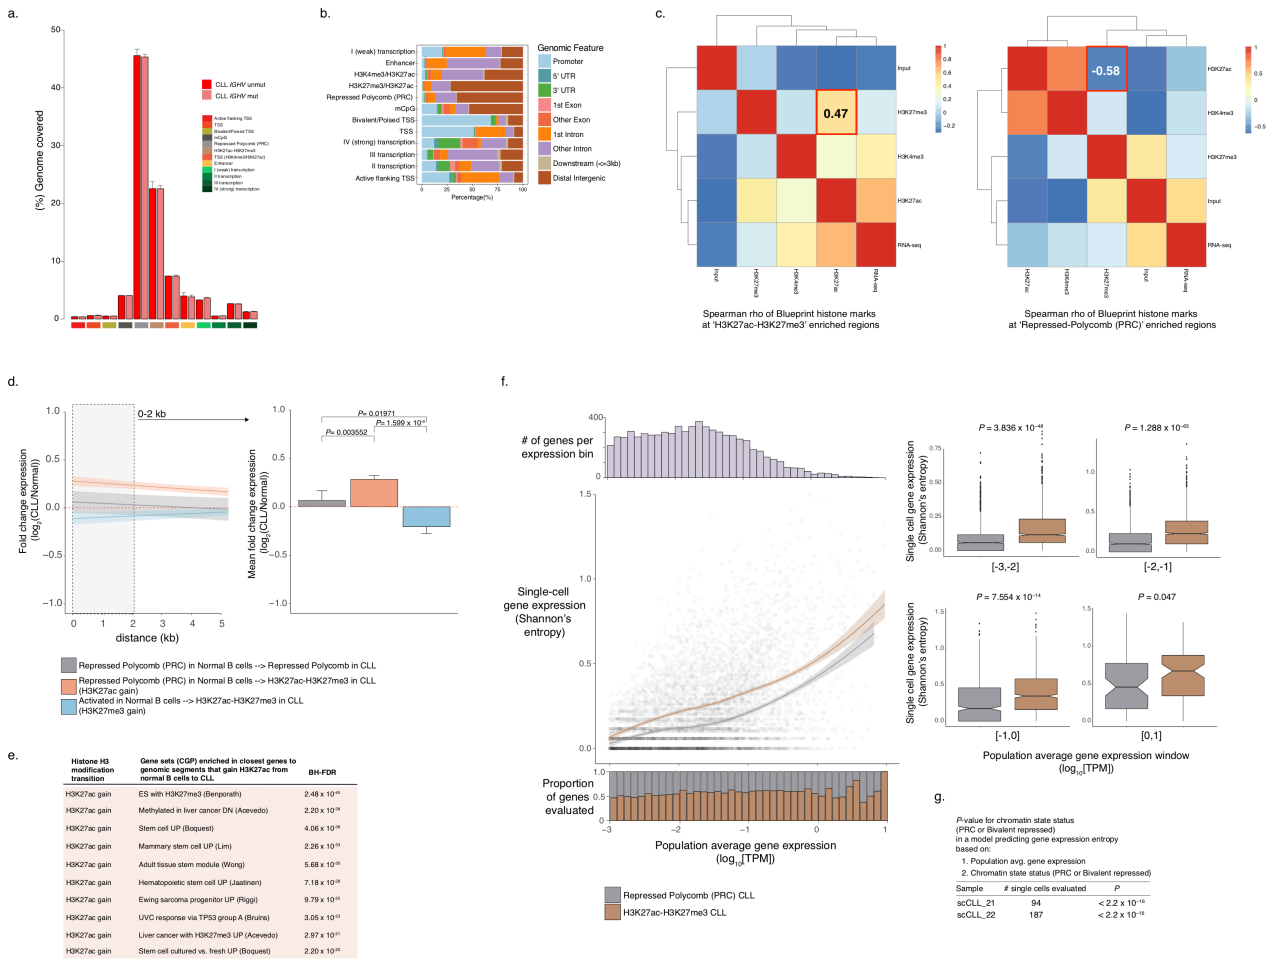



**Supplementary Figure 4. Decreased coordination between different layers of the CLL epigenome and increased cell-to-cell transcriptional heterogeneity.**

(a) Genomic coverage (%) of chromatin states from Fig. 4a in CLL *IGHV* mutated and *IGHV* unmutated, showing no significant difference between the two disease subtypes. (b) Percentage of genomic feature covered by each chromatin state from Fig. 4a. (c) Spearman's rho correlation coefficients of histone marks enrichment signal across Blueprint initiative samples at 'H3K27ac-H3K27me3' regions (*left*) and 'Repressed Polycomb (PRC)' regions (*right*) identified in our data. Red indicates high correlation, blue low correlation. (d) Fold-change gene expression [ $\log_2(\text{RPKM})$ ] between CLL and normal B cells in relation to genomic distance (kb) from regions that gain H3K27ac in CLL (orange;  $n = 11,740$  genes), regions that gain H3K27me3 in CLL (blue;  $n = 8,867$  genes), and regions that did not exhibit chromatin state transition between normal B and CLL cells (grey,  $n = 833$  genes). *P*-values are shown for two-sided Mann-Whitney U test. (e) Gene sets (CGP) enriched in closest genes (average distance of 496 bp) to genomic segments that gain H3K27ac from normal B cells to CLL (hypergeometric test BH-FDR  $< 0.05$ ; see Supplementary Data 10 for the top 50 enrichments). (f) *Left*: Single-cell gene expression Shannon's information entropy (y-axis) in relation to the population average gene expression (x-axis,  $\log_{10}[\text{TPM}]$ ) in scCLL\_21 single cells ( $n = 94$ ). Colored lines – local regression curves for genes in a 'H3K27ac-H3K27me3' (brown) or 'Repressed Polycomb (PRC)' (grey) state. *Right*: Single-cell gene expression Shannon's information entropy for each of the two HMM chromatin states for genes with population average gene expression of  $[-3,-2]$ ,  $[-2,-1]$ ,  $[-1,0]$ ,  $[0,1]$   $\log_{10}[\text{TPM}]$  (to control for differences in this variable), respectively. Boxplot represents median and bottom and upper quartile. Lower and upper whiskers correspond to  $1.5 \times \text{IQR}$ . *P*-values are shown for two-sided Mann-Whitney U test. (g) Generalized additive regression tests that model single-cell gene expression Shannon's information entropy based on population average gene expression and chromatin state status across the 2 CLL samples that underwent single-cell whole-transcriptome sequencing. Throughout the figure, error bars represent 95% confidence interval.
